# Supplementary material for: Two Patterns of Adipokine and Other Biomarker Dynamics in a Long-Term Weight Loss Intervention
Source: Oxford University Press journal article supplement (doi:10.2337/dc11-1267), 2011-12-22

# SUPPLEMENTARY DATA

**Supplementary Table 1.** Correlation matrix of intercorrelations between biomarkers within the two distinct patterns at baseline. Correlations are adjusted for age and sex. \*,  $p < 0.05$ ; \*\*,  $p < 0.01$

## Pattern A

|                 | <b>Insulin<br/>(r)</b> | <b>TG<br/>(r)</b> | <b>Leptin<br/>(r)</b> | <b>Chemerin<br/>(r)</b> | <b>MCP-1<br/>(r)</b> | <b>RBP-4<br/>(r)</b> |
|-----------------|------------------------|-------------------|-----------------------|-------------------------|----------------------|----------------------|
| <b>TG</b>       | 0.149**                |                   |                       |                         |                      |                      |
| <b>Leptin</b>   | 0.367**                | 0.033             |                       |                         |                      |                      |
| <b>Chemerin</b> | 0.099                  | 0.123*            | 0.181**               |                         |                      |                      |
| <b>MCP-1</b>    | -0.036                 | 0.005             | -0.038                | 0.059                   |                      |                      |
| <b>RBP-4</b>    | 0.033                  | 0.033             | 0.213**               | 0.044                   | 0.158**              | -0.036               |

## Pattern B

|                    | <b>HDL-C<br/>(r)</b> | <b>Adiponectin<br/>(r)</b> | <b>CRP<br/>(r)</b> | <b>Fetuin-A<br/>(r)</b> | <b>Progranulin<br/>(r)</b> |
|--------------------|----------------------|----------------------------|--------------------|-------------------------|----------------------------|
| <b>Adiponectin</b> | 0.357**              |                            |                    |                         |                            |
| <b>CRP</b>         | -0.167**             | -0.163**                   |                    |                         |                            |
| <b>Fetuin A</b>    | -0.057               | -0.006                     | -0.063             |                         |                            |
| <b>Progranulin</b> | -0.077               | -0.042                     | 0.071              | 0.037                   |                            |
| <b>Vaspin</b>      | -0.043               | -0.085                     | -0.062             | 0.080                   | 0.040                      |

## SUPPLEMENTARY DATA

**Supplementary Figure 1.** The TCC measure of trends correspondence. TCC is defined as the cosine of the angle  $\alpha$  between  $\vec{d}_{i,k}^{24}$  and the line containing  $\vec{d}_{i,k}^6$ . It represents the fraction of change in variable  $i$  in individual  $k$  in the second part of the experiment that continues the trend observed in the first.

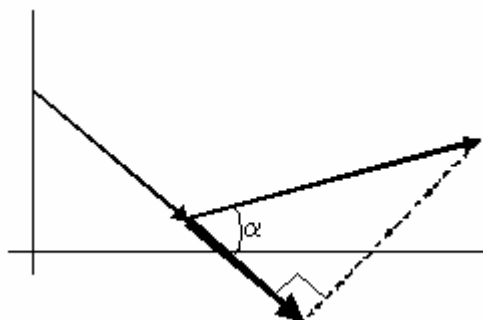

## SUPPLEMENTARY DATA

**Supplementary Figure 2.** Clustering of biomarkers, an a non-biased mathematical modeling hierarchical approach. (wt, body weight). Label A – change in the same direction as body weight (wt); label B – rebound, change of trend in the second phase (weight regain/maintenance), against the extrapolation. Tg, triglycerides

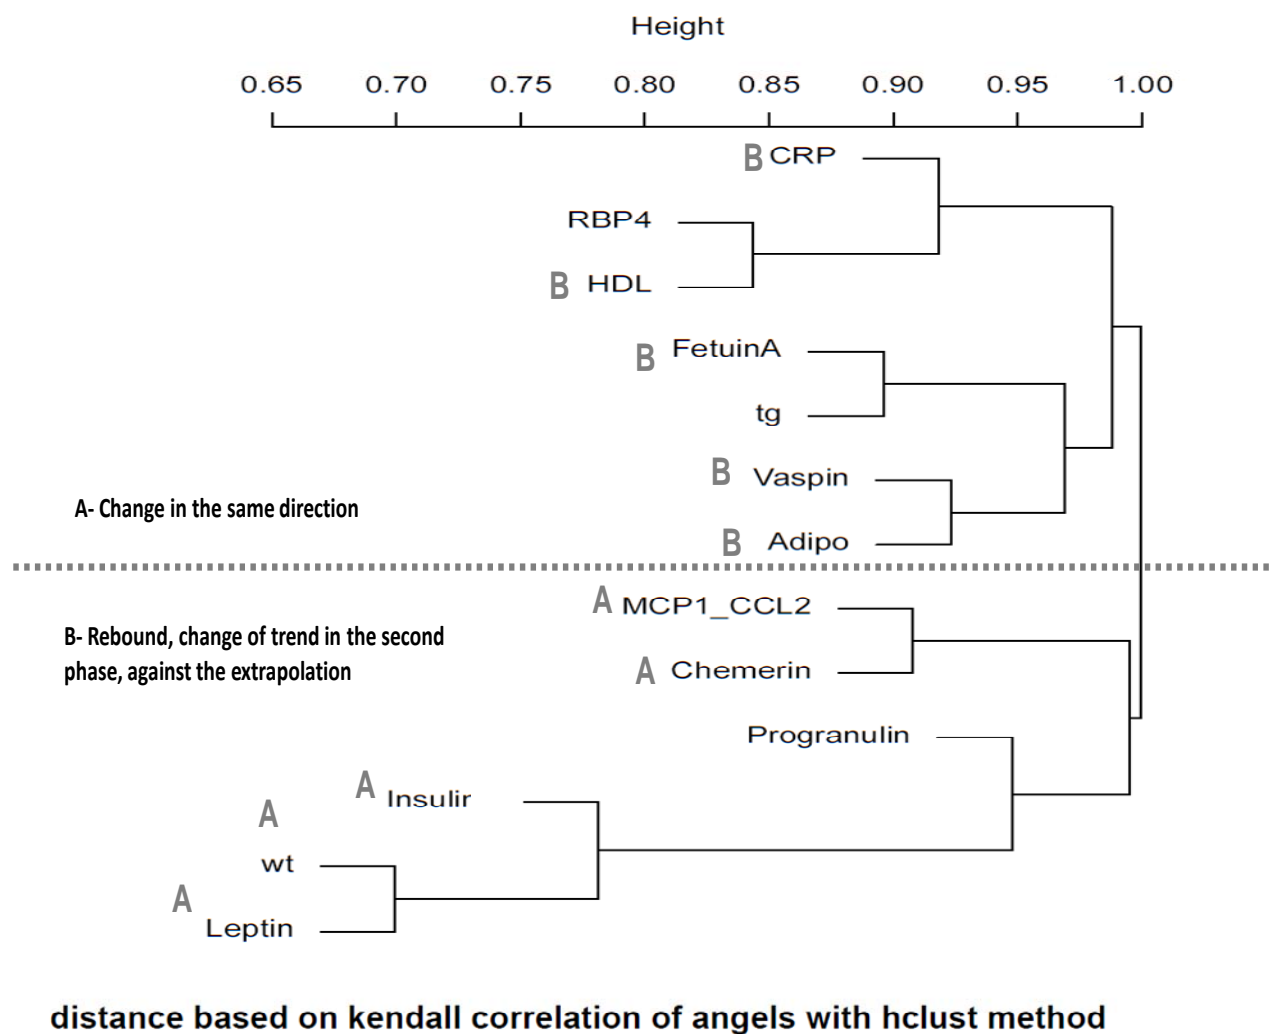

Supplement: dc111267supplementarydata.pdf [file dc111267supplementarydata.pdf]
